# Supplementary material for: Hierarchical self-assembly of hexagonal single-crystal nanosheets into 3D layered superlattices with high conductivity
Source: Royal Society of Chemistry journal article supplement (doi:10.1039/c2nr30743j), 2012-01-01
Supplement: c2nr30743j.pdf [file c2nr30743j.pdf]

# Supporting Information

## Hierarchical Self-assembly of Hexagonal Single-Crystal Nanosheets into 3D Layered Superlattices with High Conductivity

Yulun Tao,<sup>a</sup> Yuhua Shen,<sup>\*a</sup> Liangbao Yang,<sup>c</sup> Bin Han,<sup>a</sup> Fangzhi Huang,<sup>a</sup> Shikuo Li,<sup>a</sup>  
Zhuwang Chu,<sup>a</sup> and Anjian Xie<sup>\*b</sup>

<sup>a</sup>School of Chemistry and Chemical Engineering, <sup>b</sup>School of Physics and Materials Science, Anhui  
University, <sup>c</sup>Institute of Intelligent Machines, Chinese Academy of Science, Hefei 230039, P. R. China.

E-mail: [s\\_yuhua@163.com](mailto:s_yuhua@163.com) and [anjx@163.com](mailto:anjx@163.com).

Figures

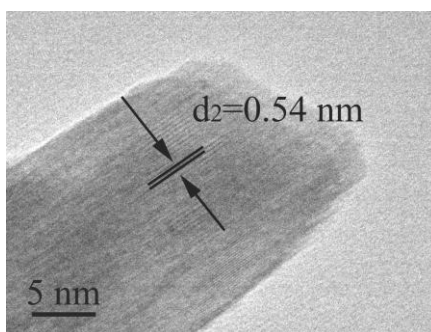

**Fig. S1.** HRTEM image of the 13-day aged nanorods prepared in cyclohexane.

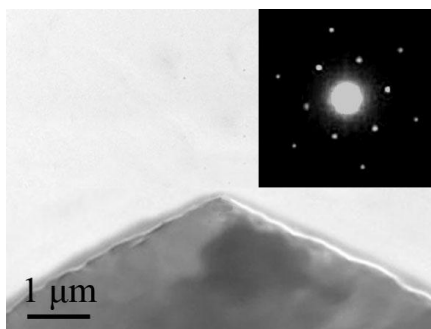

**Fig. S2.** TEM image with SAED pattern of 3-month aged hexagonal nanosheets.

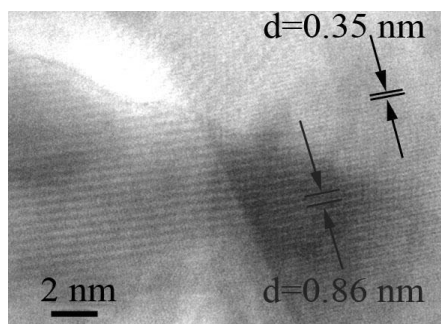

**Fig. S3.** HRTEM image of 3-month aged hexagonal nanosheets.

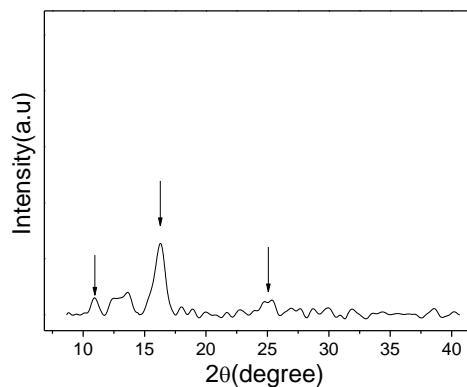

**Fig. S4.** XRD pattern of 3-month aged hexagonal nanosheets.

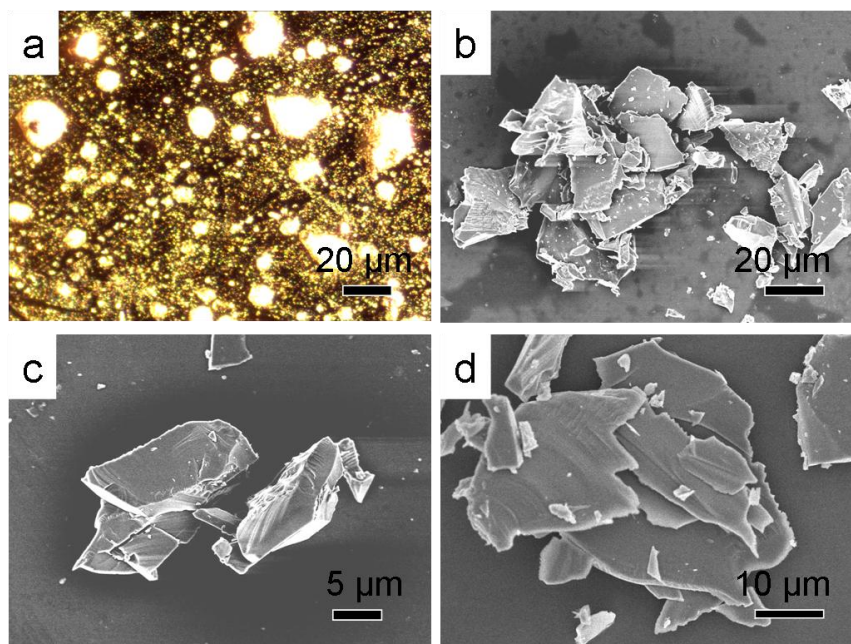

**Fig. S5.** (a,b) Microscope photograph and SEM image of 5-month aged layered crystals with superlattice structure in cyclohexane. (c,d) SEM images of 5-month aged layered crystals with superlattice structure in hexane and octane.

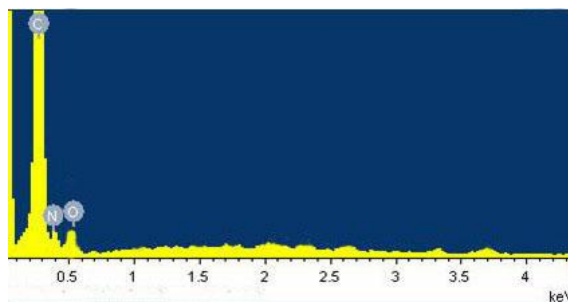

**Fig. S6.** EDS spectrum of 5-month aged layered crystals with superlattice structure in cyclohexane.

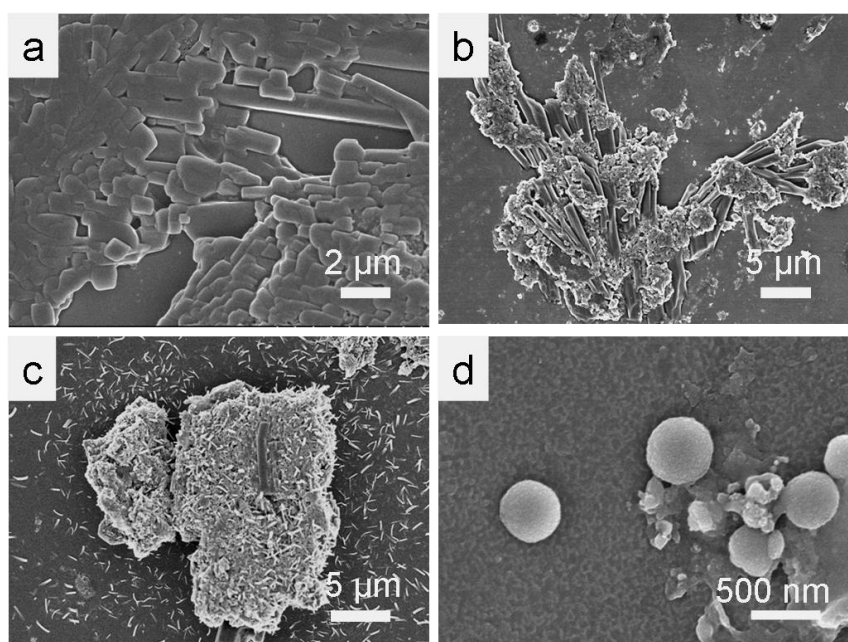

**Fig. S7.** SEM images of PANI after nanofibers are aged in (a) hexane; (b) octane; (c) benzene; (d) ethanol for 13 days, respectively.

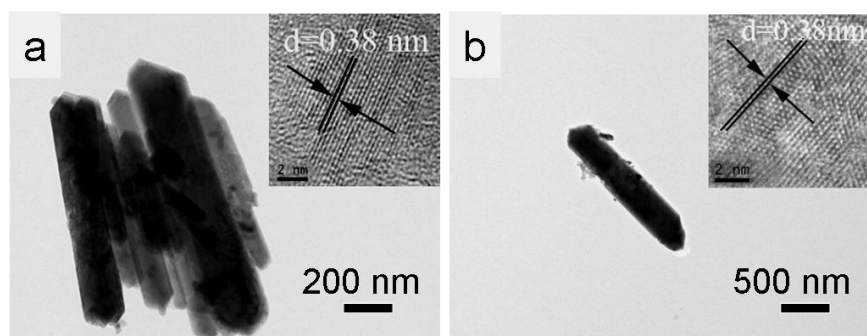

**Fig. S8.** TEM with HRTEM images of the 13-day aged nanorods prepared in (a) hexane and (b) octane, respectively.

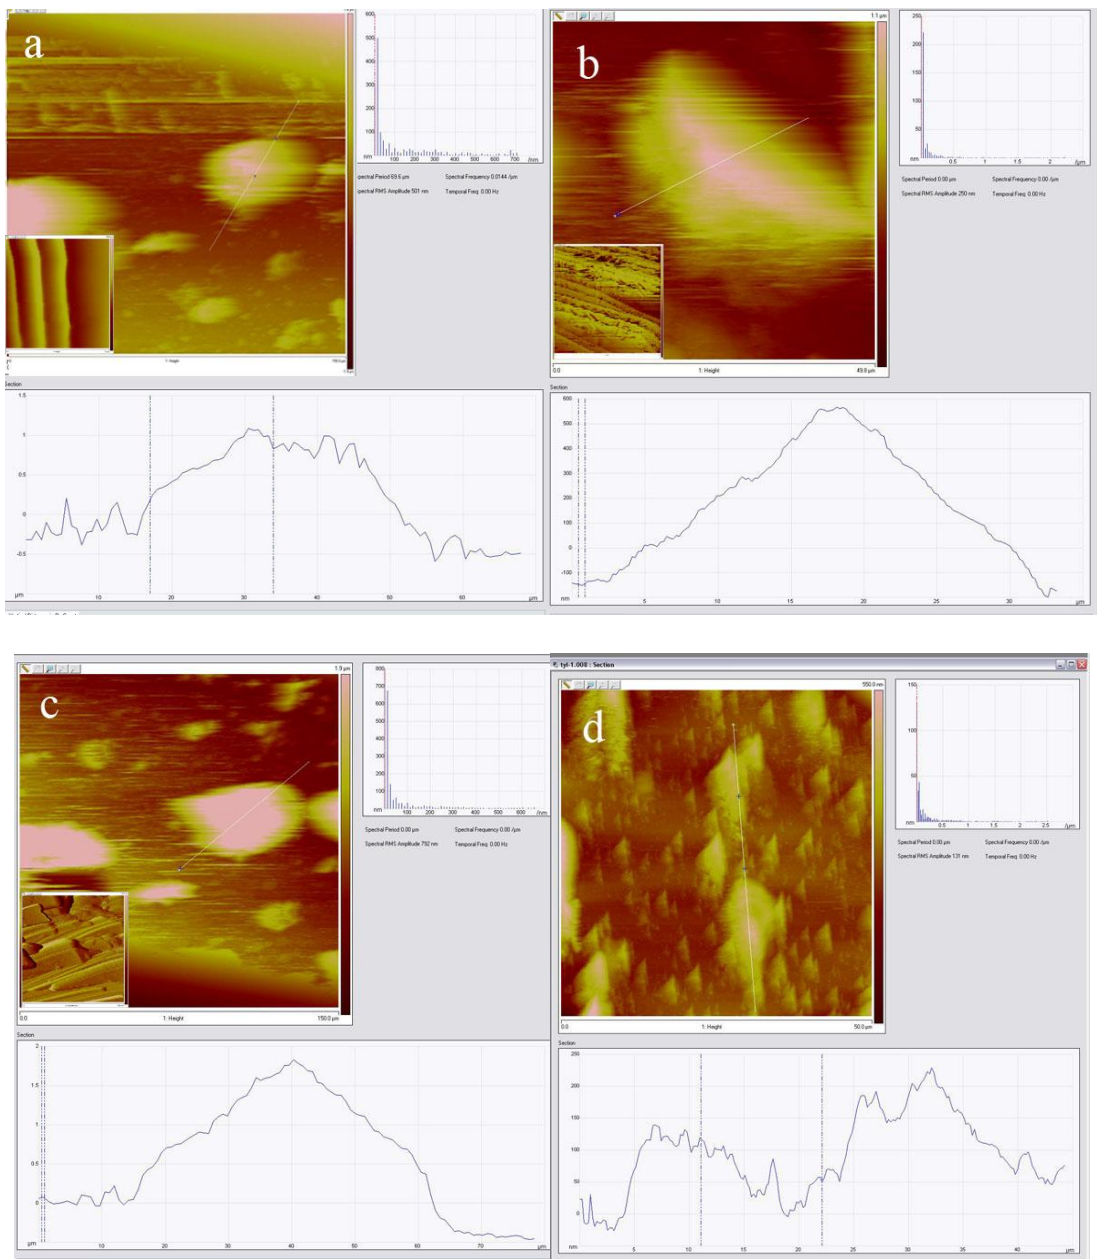

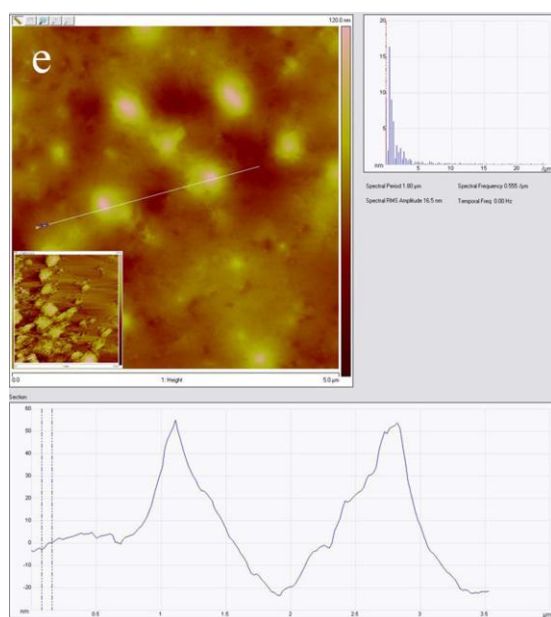

**Fig. S9.** (a-e) STM images and corresponding height profile of the 5-month aged PANI crystals with superlattice structure in (a) cyclohexane; (b) hexane; (c) octane; (d) benzene; (e) ethanol, respectively.
